# Supplementary material
Source: PubMed Central journal article supplement (PMC4184911)
Supplement: NIHMS604659-supplement-01.pdf [file NIHMS604659-supplement-01.pdf]

# 1 ONLINE SUPPLEMENT

## 2 1. The Definition of the Base of Support

3 There is no fixed base of support (BOS) during human gait cycle. This may indeed be  
4 one of the most fascinating aspects of human locomotion which is characterized by cyclic  
5 alteration of its BOS to prevent an actual fall while achieve its mobility and at a low  
6 energy cost. The size (as determined by the step length or the foot length) and the  
7 direction of the BOS are constantly and often smartly changing. It equals to the outline  
8 area of one foot during the single-stance phase or of both feet and that in-between during  
9 double-stance phase. Its alteration between these two phases comes discontinuously and  
10 abruptly, all the while the rest of the body segment motion remains in a seamless and  
11 continuous motion that all contribute to smooth forward progression of the center of mass  
12 (COM). Where to place the next foot (in vector term) is certainly not trivial, and it has  
13 anything and everything to do with the central nervous system's detection and its  
14 determination of the stability limits of the state at the time and its projection of the future.

15  
16 For all practical purposes, we have to reframe this complex human locomotion in a  
17 mathematically continuous manner for each stance phase. In all previous studies from  
18 this research group, we have been using the rear edge (or the heel) of the leading foot  
19 immediately after its touchdown as the reference point to calculate the relative position of  
20 the COM to the BOS regardless it is in double- or single-stance phases during its stance  
21 cycle until the touchdown of the contralateral foot. By then, the computation will have a  
22 reset to use the contralateral rear edge as the reference point. We used this approach to  
23 ensure the continuity for the comparison of stability among events. We understand this  
24 treatment is artificial and may even be arbitrary. On the other hand, it is also the most  
25 intuitive and straightforward one for us. Our previous experimental work has shown that  
26 the COM stability relative to the leading heel at touchdown can be a predictor of an  
27 impending falls among older adults (Bhatt et al., 2011). To make the present study  
28 comparable to all our previous ones, we used the leading heel as the reference point to  
29 calculate the relative position of the COM to the BOS.

30  
31

## 1 2. Derivations of Equations for Calculating Sensitivities

### 2 2.1 Joint position

3 Based on the parameters shown in Fig. 1, the positions of all joint centers and toes/heels  
4 can be computed as follows,

$$\begin{aligned} x_{r,hee} &= 0 \\ x_{r,ank} &= l_1 \cos(\theta_1 + \alpha) \\ x_{r,kne} &= l_1 \cos(\theta_1 + \alpha) - l_2 \sin(\theta_1 + \theta_2) \\ x_{r,hip} &= l_1 \cos(\theta_1 + \alpha) - l_2 \sin(\theta_1 + \theta_2) - l_3 \sin(\theta_1 + \theta_2 + \theta_3) \\ x_{l,hip} &= l_1 \cos(\theta_1 + \alpha) - l_2 \sin(\theta_1 + \theta_2) - l_3 \sin(\theta_1 + \theta_2 + \theta_3) - l_4 \sin \theta_4 \\ 5 \quad x_{l,kne} &= l_1 \cos(\theta_1 + \alpha) - l_2 \sin(\theta_1 + \theta_2) - l_3 \sin(\theta_1 + \theta_2 + \theta_3) - l_4 \sin \theta_4 \\ &\quad - l_3 \sin(\theta_6 - \theta_1 - \theta_2 - \theta_3 - \theta_5) \\ x_{l,ank} &= l_1 \cos(\theta_1 + \alpha) - l_2 \sin(\theta_1 + \theta_2) - l_3 \sin(\theta_1 + \theta_2 + \theta_3) - l_4 \sin \theta_4 \\ &\quad - l_3 \sin(\theta_6 - \theta_1 - \theta_2 - \theta_3 - \theta_5) - l_2 \sin(\theta_6 + \theta_7 - \theta_1 - \theta_2 - \theta_3 - \theta_5) \\ x_{l,hee} &= l_1 \cos(\theta_1 + \alpha) - l_2 \sin(\theta_1 + \theta_2) - l_3 \sin(\theta_1 + \theta_2 + \theta_3) - l_4 \sin \theta_4 \\ &\quad - l_3 \sin(\theta_6 - \theta_1 - \theta_2 - \theta_3 - \theta_5) - l_2 \sin(\theta_6 + \theta_7 - \theta_1 - \theta_2 - \theta_3 - \theta_5) \\ &\quad - l_1 \cos(\alpha - \theta_6 - \theta_7 - \theta_8 + \theta_1 + \theta_2 + \theta_3 + \theta_5) \end{aligned} \tag{S1}$$

6 where,  $\theta_{1,2,3,\dots,8}$  respectively indicated the joint angle of the leading foot, leading ankle,  
7 leading knee, pelvic rotation, leading hip, trailing hip, trailing knee, and trailing ankle.  $l_1$   
8 represented the distance between ankle and heel.  $l_2$  and  $l_3$  were the segment length of  
9 leg and thigh, respectively.  $l_4$  depicted the width of the pelvis.  $h_{2,3,4}$  respectively  
10 indicated the distance from the distal end to the COM of the leg, thigh, and HAT.  $m_{2,3,4}$   
11 respectively was the segmental mass of the leg, thigh, and HAT (Fig. 1).

### 12 2.2 COM position ( $x_{COM}$ )

13 The foot accounts for only 1.4% mass of the whole body and much less than the mass of  
14 other segments. So both feet were excluded from the COM position calculation in order  
15 to simplify the computation procedure. The COM position at the anteroposterior  
16 direction related to the leading heel can be calculated as,

$$17 \quad x_{COM} = \frac{m_2(x_{r,leg} + x_{l,leg}) + m_3(x_{r,thi} + x_{l,thi}) + m_4 x_{hat}}{2m_2 + 2m_3 + m_4} \tag{S2}$$

1 Each item in above equation is calculated by:

$$x_{r,leg} = l_1 \cos(\theta_1 + \alpha) - h_2 \sin(\theta_1 + \theta_2)$$

$$x_{r,thi} = l_1 \cos(\theta_1 + \alpha) - l_2 \sin(\theta_1 + \theta_2) - h_3 \sin(\theta_1 + \theta_2 + \theta_3)$$

$$x_{hat} = l_1 \cos(\theta_1 + \alpha) - l_2 \sin(\theta_1 + \theta_2) - l_3 \sin(\theta_1 + \theta_2 + \theta_3) - \frac{1}{2} l_4 \sin \theta_4 - h_4 \sin(\theta_1 + \theta_2 + \theta_3 + \theta_5)$$

2  $x_{l,thi} = l_1 \cos(\theta_1 + \alpha) - l_2 \sin(\theta_1 + \theta_2) - l_3 \sin(\theta_1 + \theta_2 + \theta_3) - l_4 \sin \theta_4 - (l_3 - h_3) \sin(\theta_6 - \theta_1 - \theta_2 - \theta_3 - \theta_5)$

$$x_{l,leg} = l_1 \cos(\theta_1 + \alpha) - l_2 \sin(\theta_1 + \theta_2) - l_3 \sin(\theta_1 + \theta_2 + \theta_3) - l_4 \sin \theta_4 - (l_3 - h_3) \sin(\theta_6 - \theta_1 - \theta_2 - \theta_3 - \theta_5) - (l_2 - h_2) \sin(\theta_6 + \theta_7 - \theta_1 - \theta_2 - \theta_3 - \theta_5)$$

3 As a function of seven independent variables,  $\theta_{1,2,3,\dots,7}$ ,  $x_{COM}$  can thus be expressed,

$$x_{COM} = x_{COM}(\theta_{1,2,3,\dots,7})$$

$$= l_1 \cos(\theta_1 + \alpha) + \frac{m_2 \begin{bmatrix} -(h_2 + l_2) \sin(\theta_1 + \theta_2) - l_3 \sin(\theta_1 + \theta_2 + \theta_3) \\ -l_4 \sin \theta_4 - l_3 \sin(\theta_6 - \theta_1 - \theta_2 - \theta_3 - \theta_5) \\ -(l_2 - h_2) \sin(\theta_6 + \theta_7 - \theta_1 - \theta_2 - \theta_3 - \theta_5) \end{bmatrix} + m_3 \begin{bmatrix} -2l_2 \sin(\theta_1 + \theta_2) - (h_3 + l_3) \sin(\theta_1 + \theta_2 + \theta_3) \\ -l_4 \sin \theta_4 - (l_3 - h_3) \sin(\theta_6 - \theta_1 - \theta_2 - \theta_3 - \theta_5) \end{bmatrix} + m_4 \begin{bmatrix} -l_2 \sin(\theta_1 + \theta_2) - l_3 \sin(\theta_1 + \theta_2 + \theta_3) - \frac{1}{2} l_4 \sin \theta_4 \\ -h_4 \sin(\theta_1 + \theta_2 + \theta_3 + \theta_5) \end{bmatrix}}{2m_2 + 2m_3 + m_4} \quad (S3)$$

5 By taking  $x_{COM}$ 's partial derivatives with respect to each joint angle, we obtained the

6 sensitivity of  $x_{COM}$  to each joint angle:

$$1 \quad c_1 = \frac{\partial x_{\text{COM}}}{\partial \theta_1} = -l_1 \cos(\theta_1 + \alpha) + \frac{m_2 \begin{bmatrix} -(h_2 + l_2) \cos(\theta_1 + \theta_2) - l_3 \cos(\theta_1 + \theta_2 + \theta_3) \\ + l_3 \cos(\theta_6 - \theta_1 - \theta_2 - \theta_3 - \theta_5) \\ + (l_2 - h_2) \cos(\theta_6 + \theta_7 - \theta_1 - \theta_2 - \theta_3 - \theta_5) \end{bmatrix} + m_3 \begin{bmatrix} -2l_2 \cos(\theta_1 + \theta_2) - (h_3 + l_3) \cos(\theta_1 + \theta_2 + \theta_3) \\ + (l_3 - h_3) \cos(\theta_6 - \theta_1 - \theta_2 - \theta_3 - \theta_5) \end{bmatrix} + m_4 \begin{bmatrix} -l_2 \cos(\theta_1 + \theta_2) - l_3 \cos(\theta_1 + \theta_2 + \theta_3) \\ -h_4 \cos(\theta_1 + \theta_2 + \theta_3 + \theta_5) \end{bmatrix}}{2m_2 + 2m_3 + m_4}$$

$$2 \quad c_2 = \frac{\partial x_{\text{COM}}}{\partial \theta_2} = \frac{m_2 \begin{bmatrix} -(h_2 + l_2) \cos(\theta_1 + \theta_2) - l_3 \cos(\theta_1 + \theta_2 + \theta_3) \\ + l_3 \cos(\theta_6 - \theta_1 - \theta_2 - \theta_3 - \theta_5) \\ + (l_2 - h_2) \cos(\theta_6 + \theta_7 - \theta_1 - \theta_2 - \theta_3 - \theta_5) \end{bmatrix} + m_3 \begin{bmatrix} -2l_2 \cos(\theta_1 + \theta_2) - (h_3 + l_3) \cos(\theta_1 + \theta_2 + \theta_3) \\ + (l_3 - h_3) \cos(\theta_6 - \theta_1 - \theta_2 - \theta_3 - \theta_5) \end{bmatrix} + m_4 \begin{bmatrix} -l_2 \cos(\theta_1 + \theta_2) - l_3 \cos(\theta_1 + \theta_2 + \theta_3) \\ -h_4 \cos(\theta_1 + \theta_2 + \theta_3 + \theta_5) \end{bmatrix}}{2m_2 + 2m_3 + m_4}$$

$$3 \quad c_3 = \frac{\partial x_{\text{COM}}}{\partial \theta_3} = \frac{m_2 \begin{bmatrix} l_3 \cos(\theta_1 + \theta_2 + \theta_3) \\ + l_3 \cos(\theta_6 - \theta_1 - \theta_2 - \theta_3 - \theta_5) \\ + (l_2 - h_2) \cos(\theta_6 + \theta_7 - \theta_1 - \theta_2 - \theta_3 - \theta_5) \end{bmatrix} + m_3 \begin{bmatrix} -(h_3 + l_3) \cos(\theta_1 + \theta_2 + \theta_3) \\ + (l_3 - h_3) \cos(\theta_6 - \theta_1 - \theta_2 - \theta_3 - \theta_5) \end{bmatrix} + m_4 \begin{bmatrix} -l_3 \cos(\theta_1 + \theta_2 + \theta_3) \\ -h_4 \cos(\theta_1 + \theta_2 + \theta_3 + \theta_5) \end{bmatrix}}{2m_2 + 2m_3 + m_4}$$

$$4 \quad c_4 = \frac{\partial x_{\text{COM}}}{\partial \theta_4} = -\frac{l_4 \cos \theta_4}{2}$$

$$5 \quad c_5 = \frac{\partial x_{\text{COM}}}{\partial \theta_5} = \frac{m_2 \begin{bmatrix} l_3 \cos(\theta_6 - \theta_1 - \theta_2 - \theta_3 - \theta_5) \\ + (l_2 - h_2) \cos(\theta_6 + \theta_7 - \theta_1 - \theta_2 - \theta_3 - \theta_5) \end{bmatrix} + m_3 \begin{bmatrix} (l_3 - h_3) \cos(\theta_6 - \theta_1 - \theta_2 - \theta_3 - \theta_5) \end{bmatrix} + m_4 \begin{bmatrix} -h_4 \cos(\theta_1 + \theta_2 + \theta_3 + \theta_5) \end{bmatrix}}{2m_2 + 2m_3 + m_4}$$

$$c_6 = \frac{\partial x_{\text{COM}}}{\partial \theta_6} = \frac{m_2 \begin{bmatrix} -l_3 \cos(\theta_6 - \theta_1 - \theta_2 - \theta_3 - \theta_5) \\ -(l_2 - h_2) \cos(\theta_6 + \theta_7 - \theta_1 - \theta_2 - \theta_3 - \theta_5) \end{bmatrix} + m_3 \begin{bmatrix} -(l_3 - h_3) \cos(\theta_6 - \theta_1 - \theta_2 - \theta_3 - \theta_5) \end{bmatrix}}{2m_2 + 2m_3 + m_4}$$

$$c_7 = \frac{\partial x_{\text{COM}}}{\partial \theta_7} = \frac{m_2 \begin{bmatrix} -(l_2 - h_2) \cos(\theta_6 + \theta_7 - \theta_1 - \theta_2 - \theta_3 - \theta_5) \end{bmatrix}}{2m_2 + 2m_3 + m_4}$$

### 2.3 Step length ( $s$ )

The step length, defined as the distance between both heels at TD in the anteroposterior direction, can be calculated as,

$$\begin{aligned} s &= s(\theta_{1,2,3,\dots,8}) \\ &= x_{r,\text{hee}} - x_{l,\text{hee}} \\ &= -l_1 \cos(\theta_1 + \alpha) + l_2 \sin(\theta_1 + \theta_2) + l_3 \sin(\theta_1 + \theta_2 + \theta_3) + l_4 \sin \theta_4 \\ &\quad + l_3 \sin(\theta_6 - \theta_1 - \theta_2 - \theta_3 - \theta_5) + l_2 \sin(\theta_6 + \theta_7 - \theta_1 - \theta_2 - \theta_3 - \theta_5) \\ &\quad + l_1 \cos(\alpha - \theta_6 - \theta_7 - \theta_8 + \theta_1 + \theta_2 + \theta_3 + \theta_5) \end{aligned} \quad (\text{S4})$$

The sensitivity of  $s$  to each joint angle:

$$e_1 = \frac{\partial s}{\partial \theta_1} = l_1 \sin(\theta_1 + \alpha) + l_2 \cos(\theta_1 + \theta_2) + l_3 \cos(\theta_1 + \theta_2 + \theta_3) - l_3 \cos(\theta_6 - \theta_1 - \theta_2 - \theta_3 - \theta_5) - l_2 \cos(\theta_6 + \theta_7 - \theta_1 - \theta_2 - \theta_3 - \theta_5) - l_1 \sin(\alpha - \theta_6 - \theta_7 - \theta_8 + \theta_1 + \theta_2 + \theta_3 + \theta_5)$$

$$e_2 = \frac{\partial s}{\partial \theta_2} = l_2 \cos(\theta_1 + \theta_2) + l_3 \cos(\theta_1 + \theta_2 + \theta_3) - l_3 \cos(\theta_6 - \theta_1 - \theta_2 - \theta_3 - \theta_5) - l_2 \cos(\theta_6 + \theta_7 - \theta_1 - \theta_2 - \theta_3 - \theta_5) - l_1 \sin(\alpha - \theta_6 - \theta_7 - \theta_8 + \theta_1 + \theta_2 + \theta_3 + \theta_5)$$

$$e_3 = \frac{\partial s}{\partial \theta_3} = l_3 \cos(\theta_1 + \theta_2 + \theta_3) - l_3 \cos(\theta_6 - \theta_1 - \theta_2 - \theta_3 - \theta_5) - l_2 \cos(\theta_6 + \theta_7 - \theta_1 - \theta_2 - \theta_3 - \theta_5) - l_1 \sin(\alpha - \theta_6 - \theta_7 - \theta_8 + \theta_1 + \theta_2 + \theta_3 + \theta_5)$$

$$e_4 = \frac{\partial s}{\partial \theta_4} = l_4 \cos \theta_4$$

$$e_5 = \frac{\partial s}{\partial \theta_5} = -l_3 \cos(\theta_6 - \theta_1 - \theta_2 - \theta_3 - \theta_5) - l_2 \cos(\theta_6 + \theta_7 - \theta_1 - \theta_2 - \theta_3 - \theta_5) - l_1 \sin(\alpha - \theta_6 - \theta_7 - \theta_8 + \theta_1 + \theta_2 + \theta_3 + \theta_5)$$

$$1 \quad e_6 = \frac{\partial s}{\partial \theta_6} = l_3 \cos(\theta_6 - \theta_1 - \theta_2 - \theta_3 - \theta_5) \\ + l_2 \cos(\theta_6 + \theta_7 - \theta_1 - \theta_2 - \theta_3 - \theta_5) + l_1 \sin(\alpha - \theta_6 - \theta_7 - \theta_8 + \theta_1 + \theta_2 + \theta_3 + \theta_5)$$

$$2 \quad e_7 = \frac{\partial s}{\partial \theta_7} = l_2 \cos(\theta_6 + \theta_7 - \theta_1 - \theta_2 - \theta_3 - \theta_5) + l_1 \sin(\alpha - \theta_6 - \theta_7 - \theta_8 + \theta_1 + \theta_2 + \theta_3 + \theta_5)$$

$$3 \quad e_8 = \frac{\partial s}{\partial \theta_8} = l_1 \sin(\alpha - \theta_6 - \theta_7 - \theta_8 + \theta_1 + \theta_2 + \theta_3 + \theta_5)$$

4 The sensitivity quantifies the extent to which the COM position or step length changes in  
5 response to the increment in the joint angle by one unit (i.e. one degree). Generally,  
6 positive/negative sensitivity values mean the increment of the joint angle would  
7 increase/decrease the COM position or step length. A joint with larger sensitivity  
8 influences more the COM position or step length in comparison with one with smaller  
9 sensitivity.
